# Supplementary material for: Diverse organo-peptide macrocyclesvia a fast and catalyst-free oxime/intein-mediated dual ligation
Source: Royal Society of Chemistry journal article supplement (doi:10.1039/c1cc13533c), 2011-09-07
Supplement: c1cc13533c.pdf [file c1cc13533c.pdf]

## **Diverse Organo-Peptide Macrocycles via a Fast and Catalyst-Free Oxime/Intein-Mediated Dual Ligation**

Maragani Satyanarayana, Francesca Vitali, John R. Frost, and Rudi Fasan\*

*Departments of Chemistry, University of Rochester, Rochester, New York 14627*

\*fasan@chem.rochester.edu

| <u>Index</u>            | <u>Page</u> |
|-------------------------|-------------|
| Figure S1-S4            | S2-S5       |
| Tables S1-S3            | S6-S8       |
| Experimental procedures | S9-S12      |
| Synthetic procedures    | S13-S22     |
| References              | S23         |

**Figure S1.** Representative SDS-PAGE protein gel illustrating the differential amount of precursor protein splicing (CBD5(pAcF)) observed at 2 and 5 hours after addition of the synthetic precursor **1** (lanes 2-3), **2** (lanes 4-5), or **3** (lanes 6-7).

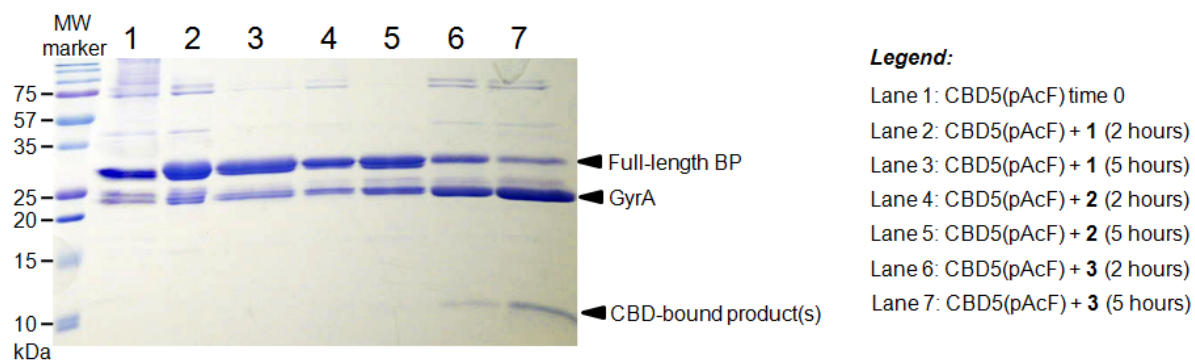

**Figure S2.** MALDI-TOF spectra of the small molecular weight products observed in the reactions (5 hours) between synthetic precursor **1** and biosynthetic precursor CBD4(pAcF) to CBD12(pAcF). Peaks corresponding to the fragment produced by spontaneous hydrolysis of the biosynthetic precursor ('h') and to the acyclic SP-containing product are indicated ('a').

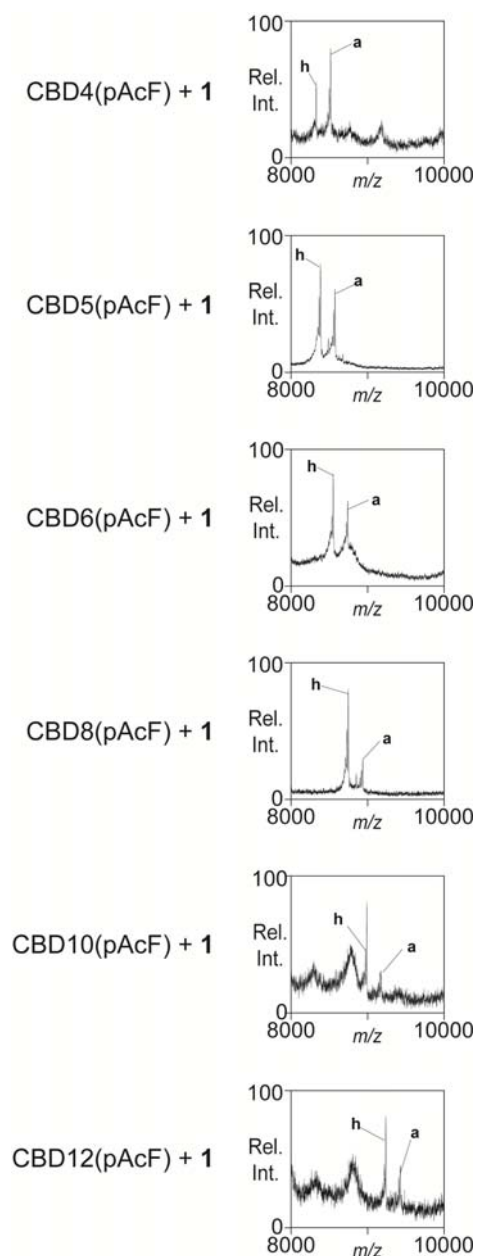

**Figure S3.** MALDI-TOF spectra of the small molecular weight products observed in the reactions (5 hours) between synthetic precursor **2** and biosynthetic precursor CBD4(pAcF) to CBD12(pAcF). Peaks corresponding to the fragment produced by spontaneous hydrolysis of the biosynthetic precursor ('h') and to the acyclic SP-containing product are indicated ('a').

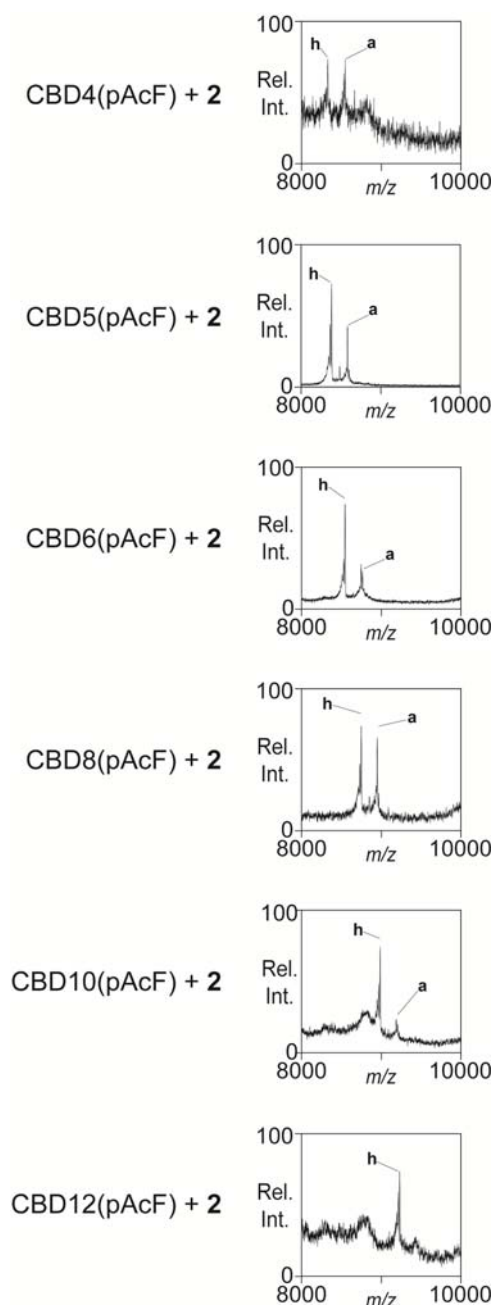

**Figure S4.** MALDI-TOF spectra of the MOrPHs obtained from the reactions between **3** and CBD5(pAcF) or CBD8(pAcF) before and after treatment with the thiol-alkylating agent iodoacetamide ( $\text{ICH}_2\text{CONH}_2$ ). ‘m’ corresponds to the MOrPH product.

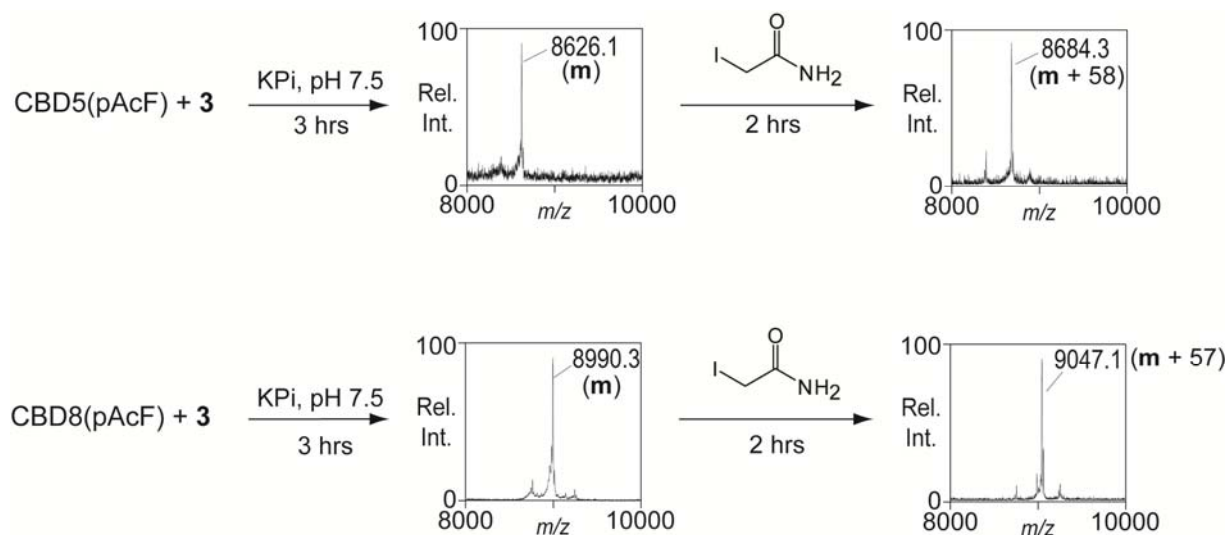

**Table S1.** Name and composition of the biosynthetic precursors investigated in this study. CBD correspond to the 71-amino acid Chitin Binding Domain (CBD) of chitinase A1 from *Bacillus circulans*<sup>1</sup>. GyrA corresponds to the GyrA intein from *Mycobacterium xenopi*<sup>2</sup>.

| Name        | Composition                |
|-------------|----------------------------|
| CBD4(pAcF)  | CBD(pAcF)TGST-GyrA         |
| CBD5(pAcF)  | CBD(pAcF)TGSGT-GyrA        |
| CBD6(pAcF)  | CBD(pAcF)TGSYGT-GyrA       |
| CBD8(pAcF)  | CBD(pAcF)TGSAEYGT-GyrA     |
| CBD10(pAcF) | CBD(pAcF)TGSKLAEYGT-GyrA   |
| CBD12(pAcF) | CBD(pAcF)TGSWGKLAEYGT-GyrA |

**Table S2.** Calculated and observed molecular weights of the reaction products between **3** and 18 members of the 5mer biosynthetic precursor library (CBD-(pAcF)-X<sub>4</sub>T-GyrA).

| 5NNK             | CBD(pAcF)X <sub>4</sub> T-SBn<br>observed<br>m/z |                                  | MORPH<br>calculated<br>m/z | MORPH<br>observed<br>m/z                             |
|------------------|--------------------------------------------------|----------------------------------|----------------------------|------------------------------------------------------|
| <b>mutant 1</b>  | 8680                                             | Macrocycle (m):<br>Acyclic (a) : | 8807<br>8825               | 8813<br>Not Observed                                 |
| <b>mutant 2</b>  | 8553                                             | Macrocycle (m):<br>Acyclic (a) : | 8680<br>8698               | 8687<br>Not Observed                                 |
| <b>mutant 3</b>  | 8683                                             | Macrocycle (m):<br>Acyclic (a) : | 8810<br>8828               | 8815<br>Not Observed                                 |
| <b>mutant 4</b>  | 8747                                             | Macrocycle (m):<br>Acyclic (a) : | 8874<br>8892               | 8879<br>Not Observed                                 |
| <b>mutant 5</b>  | 8637                                             | Macrocycle (m):<br>Acyclic (a) : | 8764<br>8782               | 8764<br>Not Observed                                 |
| <b>mutant 6</b>  | 8681                                             | Macrocycle (m):<br>Acyclic (a) : | 8808<br>8826               | 8809<br>Not Observed                                 |
| <b>mutant 7</b>  | 8612                                             | Macrocycle (m):<br>Acyclic (a) : | 8739<br>8757               | 8740<br>Not Observed                                 |
| <b>mutant 8</b>  | 8659                                             | Macrocycle (m):<br>Acyclic (a) : | 8786<br>8804               | 8787<br>Not Observed                                 |
| <b>mutant 9</b>  | 8674                                             | Macrocycle (m):<br>Acyclic (a) : | 8801<br>8819               | 8803<br>Not Observed                                 |
| <b>mutant 10</b> | 8564                                             | Macrocycle (m):<br>Acyclic (a) : | 8691<br>8709               | 8693<br>Not Observed                                 |
| <b>mutant 11</b> | 8554                                             | Macrocycle (m):<br>Acyclic (a) : | 8681<br>8699               | 8685<br>Not Observed                                 |
| <b>mutant 12</b> | 8646                                             | Macrocycle (m):<br>Acyclic (a) : | 8773<br>8791               | 8776 (~75%) <sup>a</sup><br>8794 (~25%) <sup>a</sup> |
| <b>mutant 13</b> | 8535                                             | Macrocycle (m):<br>Acyclic (a) : | 8662<br>8680               | 8663<br>Not Observed                                 |
| <b>mutant 14</b> | 8610                                             | Macrocycle (m):<br>Acyclic (a) : | 8737<br>8755               | 8740 (~70%) <sup>a</sup><br>8757 (~30%) <sup>a</sup> |
| <b>mutant 15</b> | 8678                                             | Macrocycle (m):<br>Acyclic (a) : | 8805<br>8823               | 8806<br>Not Observed                                 |
| <b>mutant 16</b> | 8662                                             | Macrocycle (m):<br>Acyclic (a) : | 8789<br>8807               | 8792<br>Not Observed                                 |
| <b>mutant 17</b> | 8606                                             | Macrocycle (m):<br>Acyclic (a) : | 8733<br>8751               | 8736<br>Not Observed                                 |
| <b>mutant 18</b> | 8733                                             | Macrocycle (m):<br>Acyclic (a) : | 8860<br>8878               | 8862<br>Not Observed                                 |

<sup>a</sup> Estimated based on peak intensity.

**Table S3.** Calculated and observed molecular weights of the reaction products between **3** and 18 members of the 8mer biosynthetic precursor library (CBD-(pAcF)-X<sub>7</sub>T-GyrA).

| 8NNK             | CBD(pAcF)X <sub>7</sub> T-SBn<br>observed<br>m/z |                 | MORPH<br>calculated<br>m/z | MORPH<br>observed<br>m/z |
|------------------|--------------------------------------------------|-----------------|----------------------------|--------------------------|
| <b>mutant 1</b>  | 8831                                             | Macrocycle (m): | 8958                       | 8960                     |
|                  |                                                  | Acyclic (a) :   | 8976                       | Not Observed             |
| <b>mutant 2</b>  | 8875                                             | Macrocycle (m): | 9002                       | 9003                     |
|                  |                                                  | Acyclic (a) :   | 9020                       | Not Observed             |
| <b>mutant 3</b>  | 9072                                             | Macrocycle (m): | 9199                       | 9200                     |
|                  |                                                  | Acyclic (a) :   | 9217                       | Not Observed             |
| <b>mutant 4</b>  | 8969                                             | Macrocycle (m): | 9096                       | 9099                     |
|                  |                                                  | Acyclic (a) :   | 9114                       | Not Observed             |
| <b>mutant 5</b>  | 8967                                             | Macrocycle (m): | 9094                       | 9094                     |
|                  |                                                  | Acyclic (a) :   | 9112                       | Not Observed             |
| <b>mutant 6</b>  | 8703 (=‘h’)                                      | Macrocycle (m): | 8936                       | Not Observed             |
|                  |                                                  | Acyclic (a) :   | 8954                       | 8954                     |
| <b>mutant 7</b>  | 9061                                             | Macrocycle (m): | 9188                       | 9188 (~80%) <sup>a</sup> |
|                  |                                                  | Acyclic (a) :   | 9206                       | 9204 (~20%) <sup>a</sup> |
| <b>mutant 8</b>  | 9005                                             | Macrocycle (m): | 9132                       | 9135                     |
|                  |                                                  | Acyclic (a) :   | 9150                       | Not Observed             |
| <b>mutant 9</b>  | 8935                                             | Macrocycle (m): | 9062                       | 9060                     |
|                  |                                                  | Acyclic (a) :   | 9080                       | Not Observed             |
| <b>mutant 10</b> | 8934                                             | Macrocycle (m): | 9061                       | 9062                     |
|                  |                                                  | Acyclic (a) :   | 9079                       | Not Observed             |
| <b>mutant 11</b> | 8829                                             | Macrocycle (m): | 8956                       | 8957                     |
|                  |                                                  | Acyclic (a) :   | 8974                       | Not Observed             |
| <b>mutant 12</b> | 8648                                             | Macrocycle (m): | 8775                       | 8778                     |
|                  |                                                  | Acyclic (a) :   | 8793                       | Not Observed             |
| <b>mutant 13</b> | 8842                                             | Macrocycle (m): | 8969                       | 8666                     |
|                  |                                                  | Acyclic (a) :   | 8987                       | Not Observed             |
| <b>mutant 14</b> | 9040                                             | Macrocycle (m): | 9167                       | 9168                     |
|                  |                                                  | Acyclic (a) :   | 9185                       | Not Observed             |
| <b>mutant 15</b> | 8841                                             | Macrocycle (m): | 8968                       | 8972                     |
|                  |                                                  | Acyclic (a) :   | 8986                       | Not Observed             |
| <b>mutant 16</b> | 9130                                             | Macrocycle (m): | 9257                       | 9260                     |
|                  |                                                  | Acyclic (a) :   | 9275                       | Not Observed             |
| <b>mutant 17</b> | 8971                                             | Macrocycle (m): | 9098                       | 9100                     |
|                  |                                                  | Acyclic (a) :   | 9116                       | Not Observed             |
| <b>mutant 18</b> | 9078                                             | Macrocycle (m): | 9205                       | 9207                     |
|                  |                                                  | Acyclic (a) :   | 9223                       | Not Observed             |

<sup>a</sup> Estimated based on peak intensity.



## Materials, Methods, and Experimental Procedures

**Reagents and Analytical Methods.** Chemical reagents, substrates, and solvents were purchased from Sigma-Aldrich, Acros Organics, and Fluka. Silica gel chromatography purifications were carried out using AMD Silica Gel 60 230-400 mesh.  $^1\text{H}$  NMR spectra and  $^{13}\text{C}$  NMR spectra were recorded on Bruker Avance spectrometers using solvent peaks as reference. Data for  $^1\text{H}$  NMR are reported in the conventional form: chemical shift ( $\delta$  ppm), multiplicity (s = singlet, d = doublet, t = triplet, q = quartet, m = multiplet, br = broad), coupling constant (Hz), integration. Data for  $^{13}\text{C}$  NMR are reported in the terms of chemical shift ( $\delta$  ppm). LC-MS analyses were performed on a Thermo Scientific LTQ Velos ESI/ion-trap mass spectrometer coupled to an Accela U-HPLC. Small molecule samples were diluted in acetonitrile/water mixtures and analyzed using a Thermo Scientific Hypersil GOLD  $\text{C}_{18}$  column (50 x 2.1 mm, 1.9  $\mu\text{m}$ ) at a flow rate of 0.5 mL/min with a gradient of 5% to 85% acetonitrile (+ 0.1% formic acid) in water (+ 0.1% formic acid). MALDI-TOF spectra were acquired on a Bruker Autoflex III MALDI-TOF spectrometer using a stainless steel MALDI plate and sinapinic acid as matrix.

**Cloning and plasmid construction.** Plasmids for the expression of the Chitin Binding Domain-containing biosynthetic precursors are derived from vector pET22b(+) (Novagen) and contain a gene encoding for CBD of chitinase A1 from *Bacillus circulans*<sup>1</sup>, followed by an amber stop codon TAG, followed by the target sequence of variable length (from 4 to 12 amino acids), followed by the gene encoding for GyrA intein from *Mycobacterium xenopi*<sup>2</sup>. The 5mer and 8mer libraries of biosynthetic precursors were prepared by PCR amplifying randomized target sequences fused to the GyrA intein using 4mer<sub>for</sub>: 5'-CTGCGCCATGGCTAGNNKNNKNNKNNKACCTGCA-TCACGGGAGATGC-3' and

*8mer\_for*: 5'-CTGCGCCATGGCTAGNNKNNKNNKNNKNNKNNKNNKNNKACCTGCATCAC-  
GGGAGATGC-3' as forward primers, respectively, *T7\_term\_rev*:  
5'-GCTAGTTATTGCTCAGCGG-3' as reverse primer, and pCBD5 as template. The PCR  
products (0.75 Kbp) were digested with *Nco* I and *Xho* I and cloned into *Nco* I/*Xho* I cassette of  
pCBD5 vector. In all the pCBD vectors, the genes encoding for the biosynthetic precursor are  
under the control of an IPTG-inducible T7 promoter. DNA sequencing was performed at the  
Functional Genomics Center of the University of Rochester. The plasmid pEVOL\_pAcF  
encoding for the engineered tRNA<sub>CUA</sub> (*MjtRNACUA*) and aminoacyl-tRNA synthetase  
(*MjTyrRS*) from *Methanococcus jannaschii* for amber codon suppression with *para*-acetyl-  
phenylalanine (pAcF) was provided by the Schultz group and it has been described previously.<sup>3</sup>

**Protein Expression and Purification.** To express the pAcF-containing biosynthetic precursors,  
each of the pCBD vectors was co-transformed with pEVOL\_pAcF into BL21(*DE3*) *E. coli* cells.  
Overnight cultures were grown in Luria-Bertani (LB) media containing ampicillin (50 mg L<sup>-1</sup>)  
and chloramphenicol (34 mg L<sup>-1</sup>) and used to inoculate a 0.4 L M9 media containing ampicillin  
(50 mg L<sup>-1</sup>) and chloramphenicol (34 mg L<sup>-1</sup>) and supplemented with 1% glycerol. Cultures were  
grown at 37° C until an OD<sub>600</sub> of 0.6 was reached, at which point protein expression was induced  
by adding 0.05% L-arabinose, 0.25 mM IPTG, and 1 mM pAcF. Cultures were grown for an  
additional 16 hours at 25° C and harvested by centrifugation at 4,000 rpm. Frozen cell pellets  
were resuspended in 50 mM Tris, 300 mM NaCl, 20 mM imidazole buffer (pH 7.4) and the cells  
lysed through sonication. After centrifugation at 14,000 rpm, the cell lysate was loaded onto a  
Ni-NTA affinity column and the protein eluted with 50 mM Tris, 150 mM NaCl, 300 mM  
imidazole (pH 7.4). After pooling and concentration of the protein-containing fractions, the

buffer was exchanged with potassium phosphate 50 mM, NaCl 150 mM buffer (pH 7.5) and aliquots of the protein solutions stored at -80°C. Protein concentration was determined using the extinction coefficient at 280 nm ( $\epsilon_{280}$ ) calculated based on the protein primary sequence. Typical expression yields for the pAcF-containing biosynthetic precursors were 25-35 mg L<sup>-1</sup> culture. The identity of the isolated proteins was confirmed by MALDI-TOF.

**Macrocyclization reactions.** Reactions were carried out at 20  $\mu$ L scale by adding synthetic precursor **1**, **2**, or **3** (final concentration: 15 mM) to a solution of protein precursor (100  $\mu$ M) in potassium phosphate buffer (50 mM, NaCl 150 mM, pH 7.5) in the presence of TCEP (final concentration: 20 mM). For SDS-PAGE analyses, 5  $\mu$ L of the reaction mixture were removed at the indicated time point(s), diluted in DTT-free 4x loading buffer, and analysed on 18% polyacrylamide gels. The extent of protein splicing was measured and quantified by densitometry analysis using the NIH Image Software. The percentage of SP-induced protein splicing was calculated based on the difference between the amount of spliced protein at time zero and at the time of the analysis. MALDI-TOF analyses of the small molecular weight products (8-10 kDa) of the reactions were carry out on a Bruker Autoflex III MALDI-TOF spectrometer. Prior to analysis, protein samples were diluted in 50% acetonitrile in H<sub>2</sub>O (0.1% TFA) and this solution mixed with a sinapinic acid solution (10 mg/mL in 50% acetonitrile in H<sub>2</sub>O with 0.1% TFA). The samples were analyzed using reflectron positive (RP) mode and calibration using small molecular weight (2-15 kDa) protein standards.

**5mer and 8mer BP library expression and reaction analysis.** From the transformation plates, 18 randomly chosen colonies were used to inoculate 5 mL of fresh LB medium containing

ampicillin ( $50 \text{ mg L}^{-1}$ ). The respective pBP plasmid were extracted from overnight cultures and used to transform BL21(DE3) cells containing pEVOL\_pAcF. The corresponding precursor proteins were produced and isolated from 50 mL-cultures according to the protocols provided above. Macrocyclization reactions were carried out in phosphate buffer (50 mM, NaCl 150 mM, pH 7.5) by mixing the precursor protein ( $100 \text{ }\mu\text{M}$ ) with compound **3** (15 mM) in the presence of TCEP (20 mM). The molecular weight of the expected macrocyclic product from each reaction was calculated based on the molecular weight corresponding to the benzyl thioester obtained from parallel reactions with the same protein and benzyl mercaptan (4 hours, room temperature). The reliability of this method was validated by DNA sequencing of 5 variants from each library.

## Synthetic Procedures

**Scheme S1.** *Synthesis of p-acetyl-phenylalanine (pAcF).*

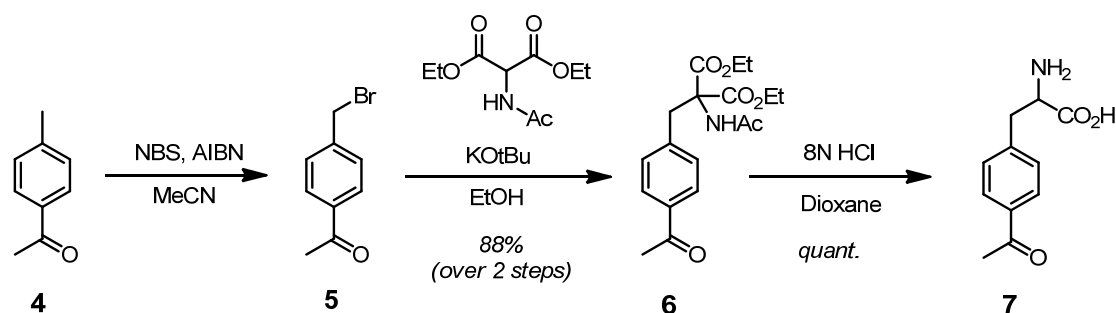

*Para*-acetylphenylalanine (**7**) was synthesized through an optimized version of a reported protocol<sup>4</sup>.

**4-bromomethyl-acetophenone (5).** 4-methyl acetophenone (**4**) (10 mL, 74.5 mmol) was dissolved in 80 mL anhydrous acetonitrile in a dry flask under argon. *N*-bromosuccinimide (NBS) (14.6 g, 82 mmol), freshly re-crystallized from water, was added to the solution of **4** followed by addition of azo-*bis*-isobutyronitrile (AIBN) (1.23 g, 7.49 mmol). The reaction mixture was heated at reflux for 1.5 hour and then cooled to room temperature. Volatiles were removed *in vacuo* and the resulting oil was re-dissolved in 500 mL dichloromethane and washed once with 1 M HCl, twice with a saturated solution of NaHCO<sub>3</sub>, and once with a saturated solution of NaCl. The organic layer was dried over MgSO<sub>4</sub> and filtered. Volatiles were removed to yield **5** as a yellow oil (16.9 g) which was carried on to the next step without further purification.

**Diethyl 2-acetamido-2-(4-acetylbenzyl)malonate (6).** Compound **5** (4.3 g, 20.2 mmol) was dissolved in 200 mL anhydrous ethanol in a dry flask under argon. The solution was added with diethylacetamidomalonate (4.82 g, 27.2 mmol) followed by 1 M potassium *tert*-butoxide in *tert*-butanol (24.25 mL, 24.2 mmol). The reaction mixture was stirred at reflux for 24 hours and then

cooled to room temperature. The reaction was concentrated *in vacuo* to about 20 mL and then diluted with 50 mL cold diethylether. The off white precipitate was collected by filtration and the procedure was repeated on the filtrate solution. The combined solids were dried *in vacuo* to yield **6** as a white solid (6.24 g, 88.3%).

***p*-acetylphenylalanine (7)**. Compound **6** (1.8 g, 5.2 mmol) was dissolved in 8 N HCl in dioxane and the reaction mixture was heated to reflux for 8 hour and then cooled to room temperature. Volatiles were removed *in vacuo* yielding *p*-acetylphenylalanine (**7**) as a light brown solid (1.25 g, quant.) <sup>1</sup>H NMR (CD<sub>3</sub>OD, 400MHz): δ 2.60 (s, 3H), 3.27 (m, 1H), 3.4 (m, 1H), 4.33 (dd, J = 7.2 Hz, 1H), 7.45 (d, J = 8 Hz, 2H), 7.99 (d, J = 8 Hz, 2H). <sup>13</sup>C NMR (100 MHz, CD<sub>3</sub>OD): δ 26.7, 37.2, 54.7, 130.1, 130.9, 137.8, 141.4, 170.9, 200.0. MS (ESI) calcd for C<sub>11</sub>H<sub>13</sub>NO<sub>3</sub> [M+H]<sup>+</sup>: *m/z* 208.1, found: 208.1

**Scheme S2.** *Synthesis of Boc protected alkoxyamino linker.*

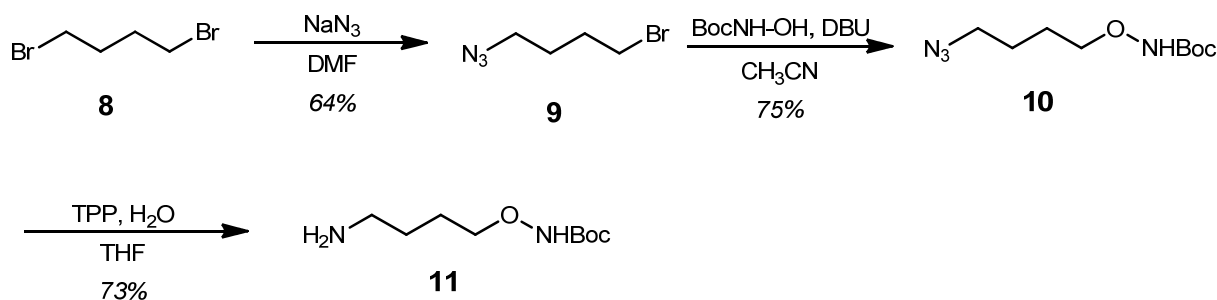

**1-azido-4-bromobutane (9)**: To a solution of 1,4-dibromobutane (**8**) (8.0 g, 37.03 mmol), in DMF (60 mL), sodium azide (2.16 g, 33.33 mmol) was added and the mixture was stirred overnight at 50 °C. Ice was then added to the mixture followed by extraction with ethyl acetate. The organic layer was washed with water, then brine, and then dried over Na<sub>2</sub>SO<sub>4</sub>. The crude residue obtained after solvent evaporation was purified by silica gel flash chromatography (100%

hexanes) to give **9** (4.2 g, 64%) as a clear oil.  $^1\text{H}$  NMR (400 MHz,  $\text{CDCl}_3$ ):  $\delta$  1.68-1.77 (m, 2H), 1.88-1.96 (m, 2H), 3.30 (t,  $J = 6.6$  Hz, 2H), 3.39 (t,  $J = 6.6$  Hz, 2H);  $^{13}\text{C}$  NMR (100 MHz,  $\text{CDCl}_3$ ):  $\delta$  27.4, 29.7, 32.9, 50.5.

**tert-butyl-4-azidobutoxycarbamate (10)**: 1-azido-4-bromobutane (**9**) (2.22 g, 12.47 mmol) was dissolved in acetonitrile (40 ml), and *N*-Boc-hydroxylamine (2.48 g, 18.7 mmol) and DBU (3.4 ml, 24.94 mmol) added to the solution under argon atmosphere at room temperature. The resulting mixture was heated to 50°C and stirred for 24 h. Water (100 ml) was then added, and the product extracted ethyl acetate. The organic layer was washed with brine, dried ( $\text{Na}_2\text{SO}_4$ ), and concentrated under reduced pressure. The resulting oil was purified by silica gel flash chromatography with hexanes : ethyl acetate (95:5) to yield **10** as a clear oil (2.1 g, 75 % yield).  $^1\text{H}$  NMR (400 MHz,  $\text{CDCl}_3$ ):  $\delta$  1.44 (s, 9H), 1.64-1.71 (m, 4H), 3.26-3.31 (m, 2H), 3.81-3.85 (m, 2H);  $^{13}\text{C}$  NMR (100 MHz,  $\text{CDCl}_3$ ):  $\delta$  25.1, 25.5, 27.8, 28.1, 28.2, 51.0, 75.9, 81.6, 156.99.

**tert-butyl-4-aminobutoxycarbamate (11)**: To a solution of *t*-butyl-4-azidobutoxycarbamate **10** (2.0 g, 8.695 mmol) in THF (40 mL), triphenylphosphine (2.96 g, 11.3 mmol) and water (1 mL) were added. The reaction mixture was stirred at room temperature for 12 hours. After removing THF under reduced pressure, the residue was purified by silica gel flash chromatography using dichloromethane : methanol (85:15) to afford **11** as a pale yellow liquid (1.29 g, 73 % yield).  $^1\text{H}$  NMR ( $\text{CDCl}_3$ , 400 MHz):  $\delta$  1.21-1.37 (br, 2H), 1.45 (s, 9H), 1.46-1.55 (m, 2H), 1.60-1.68 (m, 2H), 2.70 (t,  $J = 6.57$  Hz, 2H), 3.84 (t,  $J = 6.57$  Hz, 2H);  $^{13}\text{C}$  NMR (100 MHz,  $\text{CDCl}_3$ ):  $\delta$  25.3, 27.9, 28.1, 28.2, 29.8, 45.6, 76.3, 81.2, 157.0 .

**Scheme S3.** *Synthesis of Synthetic Precursor SPI (1).*

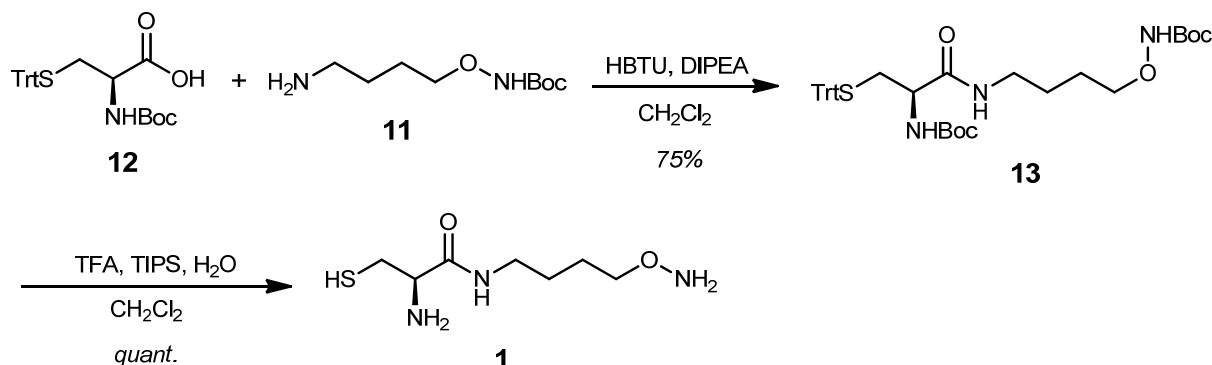

**(R)-2-amino-N-(4-(aminooxy)butyl)-3-mercaptopropanamide (1):** *S*-trityl-*N*-Boc-cysteine (1.0 g, 2.16 mmol) was dissolved in dichloromethane and *t*-butyl-4-aminobutoxycarbamate **11** (0.484g, 2.37 mmol), *O*-benzotriazole-*N,N,N',N'*-tetramethyl-uronium-hexafluoro-phosphate (HBTU) (1.22 g), and diisopropylethyl amine (0.937 mL, 5.39 mmol) were added to the solution at room temperature under argon. The mixture was stirred for 3 hours. The reaction mixture was diluted with water and extracted with dichloromethane. The organic layer was washed with brine and evaporated under reduced pressure. The residue was purified by silica gel flash chromatography using a gradient of 30 to 35% ethyl acetate in hexanes to give **13** (0.53g, 75% yield). <sup>1</sup>H NMR (CDCl<sub>3</sub>, 400 MHz): δ 1.38 (s, 9H), 1.44 (s, 9H), 1.55-1.58 (m, 4H), 2.48-2.55 (m, 1H), 2.60-2.70 (m, 1H), 3.17-3.26 (m, 2H), 3.77-3.88 (m, 3H), 4.82-4.90 (m, 1H), 6.25-6.32 (m, 1H), 7.17-7.30 (m, 9H), 7.35-7.50 (m, 6H); <sup>13</sup>C NMR (100 MHz, CDCl<sub>3</sub>): δ 25.3, 26.1, 28.0, 28.2, 28.3, 28.5, 34.0, 38.6, 39.1, 67.0, 76.2, 80.2, 81.5, 126.8, 128.0, 128.3, 129.5, 129.6, 129.89, 144.4, 155.3, 157.0, 165.7, 170.4. Compound **13** (1.0 g, 1.55 mmol) was dissolved in 50% TFA in dichloromethane (16 mL) in the presence of triisopropylsilane (0.64 mL, 3.0 mmol) and water (0.5 mL) at 0 °C. The reaction mixture was stirred for an hour in ice and completion of the deprotection was monitored by thin layer chromatography. Volatiles were then removed by evaporation and the residue washed with hexanes to yield **1**. <sup>1</sup>H NMR (400 MHz, CD<sub>3</sub>OD):





argon. To this solution diisopropylethylamine (DIPEA) (3.94 mL, 22.68 mmol) was added dropwise and the reaction mixture was stirred for 36 h at room temperature. The reaction mixture was diluted with ice-cold water and extracted with ethyl acetate. After evaporation of the solvent under reduced pressure, 4-thiotrityl-3-nitro-benzoic acid **15** was obtained by crystallization from methanol (4.0 g, 85% yield). <sup>1</sup>H NMR (DMSO-D<sub>6</sub>, 400 MHz): δ 7.01 (d, *J* = 7.0 Hz, 1H), 7.21-7.34 (m, 15H), 7.57 (d, *J* = 8.0 Hz, 1H), 8.34 (bd, *J* = 1.9 Hz, 1H); <sup>13</sup>C NMR (100 MHz, CDCl<sub>3</sub>): δ 71.7, 125.92, 128.0, 128.5, 129.9, 131.4, 132.1, 139.4, 142.54, 145.16, 147.5, 165.3. MS (ESI) Calcd. for C<sub>26</sub>H<sub>19</sub>NO<sub>4</sub>S [M+H]<sup>+</sup>: *m/z* 442.5, found: 442.6.

**tert-butyl-4-(3-nitro-4-(tritylthio)benzamido)butoxycarbamate (16):** 3-nitro-4-(tritylthio)-benzoic acid (**15**) (1.0 g, 2.26 mmol) was dissolved in dichloromethane (30 mL). To this solution *t*-butyl-4-aminobutoxycarbamate **11** (0.508 g, 2.5 mmol), HBTU (1.28 g, 3.39 mmol), and DIPEA (0.98 mL, 5.65 mmol) were added under argon. The reaction mixture was stirred for 3 hours at room temperature. The reaction mixture was diluted with dichloromethane (30 mL) and washed with water and brine. After evaporation of the organic layer, the residue was purified by silica gel flash chromatography using 35% ethyl acetate in hexanes to give **16** in 70% yield. <sup>1</sup>H NMR (CDCl<sub>3</sub>, 400 MHz): δ 1.37 (s, 9H), 1.61-1.73 (m, 4H), 3.41 (q, *J* = 6.0, 11.8 Hz, 1H), 3.84 (t, *J* = 5.4 Hz, 2H), 7.01 (d, *J* = 8.6 Hz, 1H), 7.10 - 7.28 (m, 9H), 7.34-7.39 (m, 5H), 7.43 (d, *J* = 1.8 Hz, 1H), 7.46 (s, 1H), 8.38 (d, *J* = 2.0 Hz, 1H); <sup>13</sup>C NMR (75 MHz, CDCl<sub>3</sub>): δ 25.5, 26.3, 28.1, 38.6, 39.7, 71.7, 81.7, 123.8, 127.5, 128.1, 130.1, 131.0, 131.3, 139.5, 142.6, 146.9, 157.2, 164.9, 165.7. MS (ESI) Calcd. for C<sub>35</sub>H<sub>37</sub>N<sub>3</sub>O<sub>6</sub>S [M+H]<sup>+</sup>: *m/z* 628.7, found: 628.4.

**tert-butyl-4-(3-amino-4-mercaptobenzamido)butoxycarbamate (17) and tert-butyl-4-(3-amino-4-(tritylthio)benzamido)butoxycarbamate (18):** *t*-butyl-4-(3-nitro-4-(tritylthio)benzamido)-butoxycarbamate **16** (0.69 g, 1.10 mmol) and FeSO<sub>4</sub>·7H<sub>2</sub>O (3.06 g, 11.0

mmol) were dissolved in 32 mL ethanol : water (1:1). The mixture was heated to 78°C for 30 minutes, and then added with ammonia (3.2 mL). The mixture was stirred at 78°C for two hours, then diluted with water (30 mL), and extracted with ethyl acetate (3 x 30 mL). The combined organic layers were washed with brine and evaporated under reduced pressure. The residue, which contained a mixture of **17** as disulfide dimer and **18** was further purified by silica gel flash chromatography. **17** was eluted with 35% ethyl acetate in hexanes, while **18** was eluted with 80% ethyl acetate in hexanes. Spectral data for **17**: <sup>1</sup>H NMR (CDCl<sub>3</sub>, 400 MHz): δ 1.44 (s, 9H), 1.64-1.66 (m, 4H), 3.34 (m, 2H), 3.80 (m, 2H), 6.85 (m, 1H), 7.10 (m, 1H), 7.15 (m, 1H); <sup>13</sup>C NMR (75 MHz, CDCl<sub>3</sub>): 25.1, 25.6, 27.1, 39.1, 75.3, 80.6, 113.5, 114.7, 120.4, 135.7, 137.0, 149.3, 157.7, 168.7. MS (ESI) Calcd. for disulfide dimer C<sub>32</sub>H<sub>48</sub>N<sub>6</sub>O<sub>8</sub>S<sub>2</sub> [M+H]<sup>+</sup>: *m/z* 709.9, found: 709.7. Spectral data for **18**: <sup>1</sup>H NMR (CDCl<sub>3</sub>, 400 MHz): δ 1.42 (s, 9H), 1.58-1.70 (m, 4H), 3.34-3.41 (m, 2H), 3.80-3.85 (m, 2H), 6.53-6.58 (m, 1H), 6.66-6.71 (m, 1H), 6.91-6.97 (m, 2H), 7.12-7.22 (m, 9H), 7.28-7.35 (m, 5H), 7.50 (s, 1H). MS (ESI) Calcd. for C<sub>35</sub>H<sub>39</sub>N<sub>3</sub>O<sub>4</sub>S [M+H]<sup>+</sup>: *m/z* 598.7, found: 598.7.

**3-amino-N-(4-(aminooxy)butyl)-4-mercaptobenzamide (2)**: Compound **2** was prepared from deprotection of **17** and **18** under similar conditions. Compound **17** (0.22 g, 0.619 mmol) was dissolved in dichloromethane (4 mL) and the mixture placed at 0°C under argon atmosphere. 4 mL TFA were added to the mixture dropwise followed by stirring for an hour. Completion of the deprotection reaction was monitored by thin layer chromatography (20% methanol in dichloromethane). Volatile solvents were removed under reduced pressure first followed by evaporation under high vacuum to yield **2** as a disulfide dimer. MS (ESI) Calcd. for C<sub>22</sub>H<sub>32</sub>N<sub>6</sub>O<sub>4</sub>S<sub>2</sub> (M+H)<sup>+</sup>: *m/z* 509.6, found: 509.7. Compound **18** (0.1 g, 0.167 mmol) was dissolved in 50% TFA in dichloromethane (6 mL) containing triisopropylsilane (69 μL, 0.335

mmol) and water (50  $\mu$ L). The reaction mixture was stirred for an hour in ice and completion of the deprotection was monitored by thin layer chromatography. Volatiles were then removed by evaporation and the residue washed with hexanes to yield **2** as a disulfide dimer.  $^1\text{H}$  NMR ( $\text{CD}_3\text{OD}$ , 500 MHz):  $\delta$  1.5-1.55 (m, 4H), 3.26 (t,  $J$ = 5.95 Hz, 2H), 3.59 (t,  $J$ = 5.5 Hz, 2H), 6.70 (d,  $J$ =8 Hz, 1H), 7.01 (d,  $J$ = 8 Hz, 1H), 7.07 (s, 1H).  $^{13}\text{C}$  NMR (125 MHz,  $\text{CD}_3\text{OD}$ ):  $\delta$ = 25.36, 25.57, 39.24, 75.09, 113.45, 114.87, 120.45, 135.56, 137.19, 149.33, 168.56. MS (ESI) Calcd. for  $\text{C}_{22}\text{H}_{32}\text{N}_6\text{O}_4\text{S}_2$  ( $\text{M}+\text{H}$ ) $^+$ :  $m/z$  509.6, found: 509.4.

**Scheme S5.** *Synthesis of Synthetic Precursor SP3 (3).*

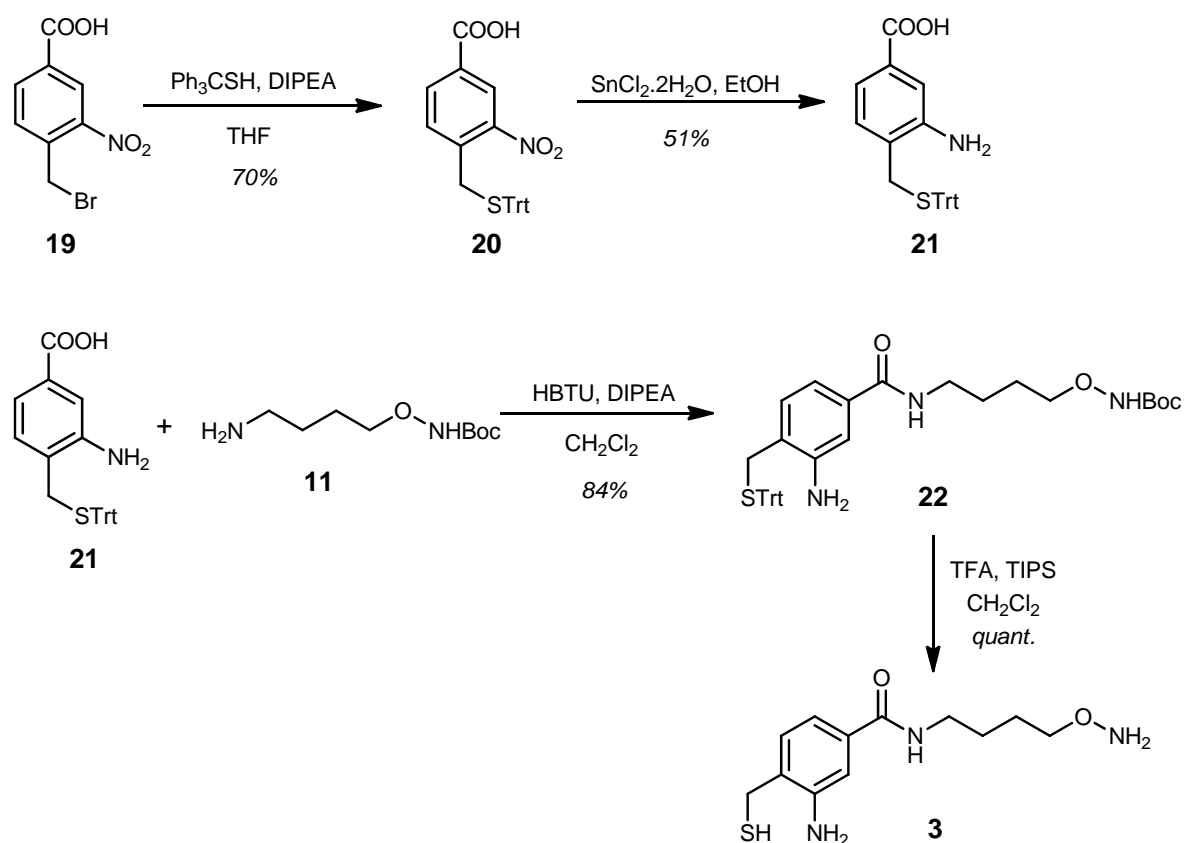

**3-nitro-4-((tritylthio)methyl)benzoic acid (20):** 4-bromomethyl-3-nitrobenzoic acid **19** (2 g, 7.69 mmol) was dissolved in tetrahydrofuran (40 mL) and the solution added with trityl

mercaptan (2.34 g, 8.46 mmol) and diisopropyl ethylamine (2.8 mL, 16.14 mmol) at room temperature. The reaction mixture was stirred for 36 hours and then was quenched with a saturated solution of ammonium chloride (4 mL) followed by extraction with ethyl acetate. The organic layer was washed with brine and the solvent evaporated under reduced pressure. The residue was purified by flash chromatography using 7.5% methanol in dichloromethane to yield **20** (2.5 g, 70% yield).  $^1\text{H}$  NMR ( $\text{CDCl}_3$ , 400 MHz):  $\delta$  3.80 (s, 2H), 6.80-6.90 (m, 1H), 7.15-7.50 (m, 15 H), 7.95-8.05 (m, 1H), 8.55 (s, 1H);  $^{13}\text{C}$  NMR (100 MHz,  $\text{CDCl}_3$ ):  $\delta$  33.8, 68.1, 126.1, 126.5, 127.0, 128.1, 129.0, 129.6, 129.7, 130.0, 132.93, 133.5, 133.6, 139.1, 139.3, 144.0, 148.5, 163.7. MS (ESI) calcd. for  $\text{C}_{27}\text{H}_{21}\text{NO}_4\text{S}$  ( $\text{M}+\text{H}$ ) $^+$ :  $m/z$  456.1 found : 456.4

**3-amino-4-((tritylthio)methyl)benzoic acid (21)**: 3-nitro-4-((tritylthio)methyl)benzoic acid **20** (1.86 g, 3.428 mmol) was dissolved in methanol (40 mL) and the solution added with  $\text{SnCl}_2 \cdot 2\text{H}_2\text{O}$  (3.85 g, 17.14 mmol). The reaction mixture was heated to 65 °C and stirred for 2 hours. The solvent was evaporated and the residue added with saturated sodium bicarbonate solution to reach pH 6 followed by extraction with ethyl acetate. The organic layer was washed with brine and evaporated under reduced pressure. The residue purified by flash chromatography using 35% ethyl acetate in hexanes to yield **21** (0.746 g, 51% yield).  $^1\text{H}$  NMR ( $\text{CDCl}_3$ , 400 MHz):  $\delta$  3.34 (s, 2H), 7.11-7.13 (m, 1H), 7.28-7.45 (m, 12 H), 7.55-7.59 (m, 5H). MS (ESI) calcd. for  $\text{C}_{27}\text{H}_{23}\text{NO}_2\text{S}$  [ $\text{M}+\text{H}$ ] $^+$ :  $m/z$  426.5 found : 426.6.

***tert*-butyl-4-(3-amino-4-((tritylthio)methyl)benzamido)butoxycarbamate (22)** 3-amino-4-((tritylthio)methyl)benzoic acid (**21**) (0.372 g, 0.875 mmol) was dissolved in dichloromethane and the solution added with *t*-butyl-4-aminobutoxycarbamate **11** (0.196 g, 0.962 mmol), HBTU (0.497 g, 1.31 mmol), and DIPEA (0.38 mL, 2.187 mmol) under argon. The reaction mixture was stirred at room temperature. After 3 hours, the reaction mixture was diluted with water and

extracted with dichloromethane (3 x 30 mL). The combined organic layers were concentrated under reduced pressure and the residue was purified by flash column chromatography in 35% ethyl acetate in hexanes to give **22** (0.45g, 84% yield). <sup>1</sup>H NMR (CDCl<sub>3</sub>, 400 MHz): δ 1.44 (s, 9H), 1.65-1.75 (m, 4H), 3.40-3.48 (q, *J* = 6.5, 12.5 Hz, 2H), 3.64 (s, 2H), 3.85 (t, *J* = 5.8 Hz, 2H), 6.34 (t, *J* = 5.9 Hz, 1H), 6.95-7.04 (m, 3H), 7.20-7.26 (m, 5H), 7.28-7.33 (m, 5H), 7.47-5.72 (m, 5H); <sup>13</sup>C NMR (75 MHz, CDCl<sub>3</sub>): δ 25.2, 26.1, 28.3, 33.3, 39.5, 67.2, 81.7, 114.7, 116.6, 123.5, 125.9-131.4(m), 135.2, 144.4, 145.4, 156.8, 167.7. MS (ESI) calcd. for C<sub>36</sub>H<sub>41</sub>N<sub>3</sub>O<sub>4</sub>S [M+H]<sup>+</sup>: *m/z* 612.8 found : 612.6.

**3-amino-*N*-(4-(aminooxy)butyl)-4-(mercaptomethyl)benzamide (3).** *tert*-butyl-4-(3-amino-4-((tritylthio)methyl)benzamido)butoxycarbamate **22** (47 mg, 0.076 mmol), triisopropylsilane (31 μL, 0.152 mmol) and water (0.1 mL) were dissolved in 50% TFA in dichloromethane (3 mL) at 0°C under argon. The reaction mixture was stirred for an hour in ice and completion of the deprotection was monitored by thin layer chromatography. Volatiles were then removed by evaporation and the residue washed with hexanes (3 x 20 mL) to yield **3**. NMR (D6-DMSO, 500 MHz): δ= 1.57-1.66 (m, 4H), 3.26 (dt, *J*= 6.45 Hz, 6.15 Hz, 2H), 3.81 (s, 2H), 3.89 (t, *J*= 6.1 Hz, 2H), 6.79 (dd, *J*= 7.75 Hz, 1.14 Hz, 1H), 7.06 (d, *J*= 7.85, 1H), 7.13 (d, *J*= 1.45, 1H), 8.25 (t, *J*= 5.9 Hz, 1H). <sup>13</sup>C NMR (125 MHz, D6-DMSO): δ= 25.18, 25.91, 30.43, 74.43, 114.39, 114.62, 122.70, 131.42, 135.47, 146.75, 167.18. MS (ESI) calcd. for C<sub>12</sub>H<sub>19</sub>N<sub>3</sub>O<sub>2</sub>S C<sub>11</sub>H<sub>13</sub>NO<sub>3</sub> [M+H]<sup>+</sup>: 270.1, found: 270.2.

## References:

- (1) Watanabe, T.; Ito, Y.; Yamada, T.; Hashimoto, M.; Sekine, S.; Tanaka, H. *J. Bacteriol.* **1994**, *176*, 4465.
- (2) Telenti, A.; Southworth, M.; Alcaide, F.; Daugelat, S.; Jacobs, W. R., Jr.; Perler, F. B. *J. Bacteriol.* **1997**, *179*, 6378.
- (3) Young, T. S.; Ahmad, I.; Yin, J. A.; Schultz, P. G. *J. Mol. Biol.* **2010**, *395*, 361.
- (4) Wang, L.; Zhang, Z.; Brock, A.; Schultz, P. G. *Proc. Natl. Acad. Sci. USA* **2003**, *100*, 56;  
Pieck, J. C.; Kuch, D.; Grolle, F.; Linne, U.; Haas, C.; Carell, T. *J. Am. Chem. Soc.* **2006**, *128*, 1404.
